# Supplementary material for: Natural Variants of AtHKT1 Enhance Na+ Accumulation in Two Wild Populations of Arabidopsis
Source: PLOS journal article supplement (doi:10.1371/journal.pgen.0020210), 2006-01-01
Supplement: S2 (10.1371/journal.pgen.0020210.s002) [file journal.pgen.0020210.s002]

Figure S2. Alignment of At*HKT1* cDNA (A) and promoter (B) sequences from Col-0, Ts-1 (CS 1552) and Tsu-1 (CS 1640).

A. Alignment of At*HKT1* cDNA sequences from Col-0, Ts-1 and Tsu-1.

1 80

Col-0 (1) ATGGACAGAGTGGTGGCAAAAATAGCAAAAATCCGTTCGCAGCTTACTAAATTACGTTCACTATTCTTCCTTTACTTCAT

Ts-1 (1) ATGGACATAGTGGTGGCAAAAATAGCAAACATTCGTTCGCAGCTTACTAAATTACGTTCTCTATTCTTCCTTTACTTCAT

Tsu-1 (1) ATGGACATAGTGGTGGCAAAAATAGCAAACATTCGTTCGCAGCTTACTAAATTACGTTCTCTATTCTTCCTTTACTTCAT

81 160

Col-0 (81) CTACTTCTTGTTCTTCTCCTTTTTAGGGTTTTTGGCACTCAAGATCACAAAGCCAAGAACCACTTCACGTCCTCATGACT

Ts-1 (81) CTACTTCTTGTTCTTCTCCTTTTTAGGGTTTTTGGCACTCAAGATCACAAAGCCAAGAACCACTTCACGTCCTCATGACT

Tsu-1 (81) CTACTTCTTGTTCTTCTCCTTTTTAGGGTTTTTGGCACTCAAGATCACAAAGCCAAGAACCACTTCACGTCCTCATGACT

161 240

Col-0 (161) TTGACCTTTTCTTCACTTCTGTCTCTGCCATCACCGTCTCTTCCATGTCTACCGTCGACATGGAAGTCTTCTCCAACACC

Ts-1 (161) TTGACCTTTTCTTCACTTCTGTCTCTGCCATAACCCTCTCTTCCATGTCTACCGTCGACATGGAAGTCTTCTCCAACACC

Tsu-1 (161) TTGACCTTTTCTTCACTTCTGTCTCTGCCATAACCCTCTCTTCCATGTCTACCGTCGACATGGAAGTCTTCTCCAACACC

241 320

Col-0 (241) CAACTTATCTTCCTCACTATCCTCATGTTCCTCGGTGGCGAAATCTTCACCTCCTTTCTCAACCTCTACGTCTCCTATTT

Ts-1 (241) CAACTTATCTTCCTCACTATCCTCATGTTCCTTGGTGGCGAAATCTTCACCTCCTTTCTCAACCTCTATGTCTCCTATTT

Tsu-1 (241) CAACTTATCTTCCTCACTATCCTCATGTTCCTTGGTGGCGAAATCTTCACCTCCTTTCTCAACCTCTATGTCTCCTATTT

321 400

Col-0 (321) CACCAAGTTCGTCTTCCCTCATAACAAGATTAGACATATTTTGGGATCTTATAATTCGGACAGTTCCATCGAGGATCGCT

Ts-1 (321) CACCAAGTTCGTCTTCCCTCATAACAAGATTAGACATATTTTGGGATCTTATAATTCGGACAGTTCCATCGAGGATCGCT

Tsu-1 (321) CACCAAGTTCGTCTTCCCTCATAACAAGATTAGACATATTTTGGGATCTTATAATTCGGACAGTTCCATCGAGGATCGCT

401 480

Col-0 (401) GTGACGTTGAGACTGTTACTGATTATCGCGAGGGTCTTATCAAGATCGATGAAAGGGCATCTAAGTGCTTGTACTCGGTG

Ts-1 (401) ATGACGTTGAGACTGTTACTGATTATCGCGAGGGTCTTATCAAGATCGATGAAAGGGCATCTAAGTGCTTGTACTCGGTG

Tsu-1 (401) ATGACGTTGAGACTGTTACTGATTATCGCGAGGGTCTTATCAAGATCGATGAAAGGGCATCTAAGTGCTTGTACTCGGTG

481 560

Col-0 (481) GTTCTTAGTTACCATCTTGTTACTAACCTAGTTGGCTCTGTGTTGCTTCTTGTGTACGTAAATTTTGTTAAAACGGCGAG

Ts-1 (481) GTTCTTAGTTACCATCTTGTTACTAACCTAGTTGGCTCTGTGTTGCTTCTTGTGTACGTAAATTTTGTTAAAACGGCGAG

Tsu-1 (481) GTTCTTAGTTACCATCTTGTTACTAACCTAGTTGGCTCTGTGTTGCTTCTTGTGTACGTAAATTTTGTTAAAACGGCGAG

561 640

Col-0 (561) AGATGTTCTTAGTTCCAAAGAAATCTCACCTCTCACTTTCTCCGTCTTCACAACTGTTTCCACGTTTGCAAACTGCGGAT

Ts-1 (561) AGATGTTCTTAGTTCCAAAGAAATCTCACCTCTCACTTTCTCCGTCTTCACAACAGTTTCCACGTTTGCAAACTGCGGAT

Tsu-1 (561) AGATGTTCTTAGTTCCAAAGAAATCTCACCTCTCACTTTCTCCGTCTTCACAACAGTTTCCACGTTTGCAAACTGCGGAT

641 720

Col-0 (641) TTGTCCCCACGAATGAGAACATGATCATCTTTCGCAAGAACTCTGGTCTCATCTGGCTCCTAATCCCTCAAGTACTGATG

Ts-1 (641) TTGTCCCTACGAATGAGAATATGATCATCTTTCGCAAGAACTCTGGTCTCATCTGGCTCCTAATCCCTCAAGTACTGATG

Tsu-1 (641) TTGTCCCTACGAATGAGAATATGATCATCTTTCGCAAGAACTCTGGTCTCATCTGGCTCCTAATCCCTCAAGTACTGATG

721 800

Col-0 (721) GGAAACACTTTGTTCCCTTGCTTCTTGGTTTTGCTCATATGGGGACTTTATAAGATCACAAAGCGTGACGAGTATGGTTA

Ts-1 (721) GGAAACACTTTGTTCCCTTGCTTCTTGGTTTTGCTCATATGGGGACTTTATAAGATCACAAAGCGTGACGAGTATGGTTA

Tsu-1 (721) GGAAACACTTTGTTCCCTTGCTTCTTGGTTTTGCTCATATGGGGACTTTATAAGATCACAAAGCGTGACGAGTATGGTTA

801 880

Col-0 (801) CATTCTCAAGAACCACAATAAGATGGGATACTCTCATCTACTCTCGGTTCGTCTATGTGTTCTTCTTGGAGTGACGGTGC

Ts-1 (801) CATTCTCAAGAACCACAATAAGATGGGATACTCTCATCTACTCTCGGTTCGTCTATGTGTTCTTCTTGGAGTGACGGTGC

Tsu-1 (801) CATTCTCAAGAACCACAATAAGATGGGATACTCTCATCTACTCTCGGTTCGTCTATGTGTTCTTCTTGGAGTGACGGTGC

881 960

Col-0 (881) TAGGGTTTCTGATAATACAGCTTCTTTTCTTCTGCGCCTTTGAATGGACCTCTGAGTCTCTAGAAGGAATGAGTTCGTAC

Ts-1 (881) TAGGGTTTCTGATAATACAGCTTCTTTTCTTCTGCGCCTTTGAATGGACCTCTGAGTCTCTAGAAGGAATGAGTTCGTAC

Tsu-1 (881) TAGGGTTTCTGATAATACAGCTTCTTTTCTTCTGCGCCTTTGAATGGACCTCTGAGTCTCTAGAAGGAATGAGTTCGTAC

961 1040

Col-0 (961) GAGAAGTTGGTTGGATCGTTGTTTCAAGTGGTGAATTCGCGACACACCGGAGAAACTATAGTAGACCTCTCTACACTTTC

Ts-1 (961) GAGAAGTTGGTTGGATCGTTGTTTCAAGTGGTGAATTCGCGACACACCGGAGAAACTATAGTAGACCTCTCTACACTTTC

Tsu-1 (961) GAGAAGTTGGTTGGATCGTTGTTTCAAGTGGTGAATTCGCGACACACCGGAGAAACTATAGTAGACCTCTCTACACTTTC

1041 1120

Col-0 (1041) CCCAGCTATCTTGGTACTCTTTATTCTTATGATGTATCTTCCTCCATACACTTTATTTATGCCGTTGACGGAACAAAAGA

Ts-1 (1041) CCCAGCTATCTTGGTACTCTTTATTCTTATGATGTATCTTCCTCCATACACTTTATTTATGCCGTTGACGGAACAAAAGA

Tsu-1 (1041) CCCAGCTATCTTGGTACTCTTTATTCTTATGATGTATCTTCCTCCATACACTTTATTTATGCCGTTGACGGAACAAAAGA

1121 1200

Col-0 (1121) CGATAGAGAAAGAAGGAGGAGATGATGATTCCGAAAATGGAAAGAAAGTTAAAAAGAGTGGACTCATCGTGTCACAACTT

Ts-1 (1121) CGATAGAGAAAGAAGGAGGAGATGATGATTCCGGAAATGGAAAGAAAGTTAAAAAGAGTGGACTCATCGTGTCACAACTT

Tsu-1 (1121) CGATAGAGAAAGAAGGAGGAGATGATGATTCCGGAAATGGAAAGAAAGTTAAAAAGAGTGGACTCATCGTGTCACAACTT

1201 1280

Col-0 (1201) TCCTTTTTGACGATATGTATCTTTCTCATTTCAATCACCGAAAGGCAAAATCTACAACGTGATCCGATAAATTTCAACGT

Ts-1 (1201) TCCTTTTTGACGATATGTATCTTTCTCATTTCAATCACCGAAAGGCAAAATCTACAACGTGATCCGATAAATTTCAACGT

Tsu-1 (1201) TCCTTTTTGACGATATGTATCTTTCTCATTTCAATCACCGAAAGGCAAAATCTACAACGTGATCCGATAAATTTCAACGT

1281 1360

Col-0 (1281) CCTTAACATCACTCTCGAAGTTATCAGTGCATATGGAAACGTTGGTTTCACTACCGGGTACAGCTGTGAACGGCGTGTGG

Ts-1 (1281) CCTTAACATCACTCTCGAAGTTATCAGTGCATATGGAAACGTGGGTTTCACTACCGGGTACAGCTGTGAACGGCGTCTGG

Tsu-1 (1281) CCTTAACATCACTCTCGAAGTTATCAGTGCATATGGAAACGTGGGTTTCACTACCGGGTACAGCTGTGAACGGCGTCTGG

1361 1440

Col-0 (1361) ACATCAGCGATGGTGGCTGCAAAGACGCGAGTTATGGGTTTGCAGGACGATGGAGTCCAATGGGAAAATTCGTACTAATA

Ts-1 (1361) ACATCAGCGATGGTGGCTGCAAAGACGCGAGTTATGGGTTTGCAGGACGATGGAGTCCAATGGGTAAATTGGTACTAATA

Tsu-1 (1361) ACATCAGCGATGGTGGCTGCAAAGACGCGAGTTATGGGTTTGCAGGACGATGGAGTCCAATGGGTAAATTGGTACTAATA

1441 1520

Col-0 (1441) ATAGTAATGTTTTATGGTAGGTTTAAGCAGTTCACAGCCAAATCTGGCCGCGCATGGATTCTTTACCCCTCGTCTTCCTA

Ts-1 (1441) ATAGTGATGTTTTATGGTAGGTTTAAGCAGTTCACAGCCAAATCTGGCCGCGCATGGATACTTTACCCCTCGTCTTCCTA

Tsu-1 (1441) ATAGTGATGTTTTATGGTAGGTTTAAGCAGTTCACAGCCAAATCTGGCCGCGCATGGATACTTTACCCCTCGTCTTCCTA

1521

Col-0 (1521) A

Ts-1 (1521) A

Tsu-1 (1521) A

B. Alignment of At*HKT1* promoter sequences from Col-0, Ts-1 and Tsu-1.

1 120

Col-0 (1) AGAAATCGCTCAACAAACTACTACGTACTAATCGACTAAGCT**T**CATTCTTGTGCAGCCTATTCCTAGCTACTCAATCACGTT**G**TCTAGTAACTAACCAGGCTAATTTGCAATGTTCATAG

Ts-1 (1) AGAAATCGCTCAACAAACTACTACGTACTAATCGACTAAGCT**C**CATTCTTGTGCAGCCTATTCCTAGCTACTCAATCACGTT**G**TCTAGTAACTAACCAGGCTAATTTGCAATGTTCATAG

Tsu-1 (1) AGAAATCGCTCAACAAACTACTACGTACTAATCGACTAAGCT**C**CATTCTTGTGCAGCCTATTCCTAGCTACTCAATCACGTT**A**TCTAGTAACTAACCAGGCTAATTTGCAATGTTCATAG

121 240

Col-0 (121) GTATTTGAGTAAAGAACTCAGTTAAAAAGTTTCATCAAGCAATA**C**TACAACAAAAACACATCAAGTCCGCATACACGTTCCACAATTCACGCCATCTTTGACCTATCATTTAGGTCATTG

Ts-1 (121) GTATTTGAGTAAAGAACTCAGTTAAAAAGTTTCATCAAGCAATA**A**TACAACAAAAACACATCAAGTCCGCATACACGTTCCACAATTCACGCCATCTTTGACCTATCATTTAGGTCATTG

Tsu-1 (121) GTATTTGAGTAAAGAACTCAGTTAAAAAGTTTCATCAAGCAATA**A**TACAACAAAAACACATCAAGTCCGCATACACGTTCCACAATTCACGCCATCTTTGACCTATCATTTAGGTCATTG

241 360

Col-0 (241) TGTTAATTACATCATTATCCATGGCCAACAATTCATA**A**CACCAAAAC**CATC**ACAAACTTATTTCAAATCTATCATGCAACTAGGGTTTCAAAATTGTAAAATTTCGCAGGTGACCTTACT

Ts-1 (241) TGTTAATTACATCATTATCCATGGCCAACAATTCATA**G**CACCAAAAC**CATC**ACAAACTTATTTCAAATCTATCATGCAACTAGGGTTTCAAAATTGTAAAATTTCGCAGGTGACCTTACT

Tsu-1 (241) TGTTAATTACATCATTATCCATGGCCAACAATTCATA**G**CACCAAAAC**----**ACAAACTTATTTCAAATCTATCATGCAACTAGGGTTTCAAAATTGTAAAATTTCGCAGGTGACCTTACT

361 480

Col-0 (361) AGTAATAGGTCCGGCTGACA**T**A**T**A**T**ATATATATATATATATATATATATAAAGACATTAAAAGAGAGGTCACTTAAGTTAAAATGGAACTATCGACGAGTAAGTGACCTTTCGTCTTTTT

Ts-1 (361) AGTAATAGGTCCGGCTGACA**C**A**C**A**T**A----------------------------------------------------------------------------------------------

Tsu-1 (357) AGTAATAGGTCCGGCTGACA**C**A**C**A**C**ATATATATATATATATATATATATA----------------------------------------------------------------------

481 600

Col-0 (481) TATTTTTCCATTAGTGTATAATGTAACTTTTACTTCATTAGTGTTACTTTTCCTCGATACTTGGTGGCTCTGAATAATATTATCTCTTAGAAGATCTCCGAAGTTGTCGTATAAAAATTC

Ts-1 (387) ------------------------------------------------------------------------------------------------------------------------

Tsu-1 (407) ------------------------------------------------------------------------------------------------------------------------

601 720

Col-0 (601) ATTTACAAACCTAGGTGGAGATAACATTTTAAAAGAATGGATTCTTTAGTGCTAAACGCATTTAAGAAAGATGAACATATTTTGTTCGTCCTCTATTGGCAACATCTTTATCAAGACTCG

Ts-1 (387) ------------------------------------------------------------------------------------------------------------------------

Tsu-1 (407) ------------------------------------------------------------------------------------------------------------------------

721 840

Col-0 (721) AATTTAATTCTCTTTAAAAAGAGATTTAAATATGTTAATGATTTAAAAGTGGCCATCTAGCAAGTGATTGATACATCACGATTTAAATATTATTATCAAGCAATAATATTTCATCTAGCA

Ts-1 (387) ------------------------------------------------------------------------------------------------------------------------

Tsu-1 (407) ------------------------------------------------------------------------------------------------------------------------

841 960

Col-0 (841) AGTGATTGATACTCAGTTAAAAAGTTTCATCAAGCAATAATACAACAAAAACACATCAAGTCCGCATACACGTTCCACAATTCACGCCATCTTTGACCTATCATTTAGGTCATTGTGTTA

Ts-1 (387) ------------------------------------------------------------------------------------------------------------------------

Tsu-1 (407) ------------------------------------------------------------------------------------------------------------------------

961 1080

Col-0 (961) ATTACATTATTATCCATGGCCAACAATTCATAGCACCAAAACCATCACAAACTTATTTCAAATCTATCATGCAACTAGGGTTTCAAAATTGTAAAATTTCGCAGGTGACCTTACTAGTAA

Ts-1 (387) ------------------------------------------------------------------------------------------------------------------------

Tsu-1 (407) ------------------------------------------------------------------------------------------------------------------------

1081 1200

Col-0 (1081) TAGGTCCGGCTGACACATATATATATAT----------ATATATATAAA**A**ACACTAAAAGAGAGGTCACTTAAGTTAAAATGGTACTATCGACGAGTAAGTGACCTTTCGTCTTTTTTAT

Ts-1 (387) -----------------------------------------TATATAAA**G**ACACTAAAAGAGAGGTCACTTAAGTTAAAATGGTACTATCGACGAGTAAGTGACCTTTCGTCTTTTTTAT

Tsu-1 (407) -----------------TATATATATATATATATATATATATATATAAA**G**ACACTAAAAGAGAGGTCACTTAAGTTAAAATGGTACTATCGACGAGTAAGTGACCTTTCGTCTTTTTTAT

1201 1320

Col-0 (1191) TTTTCCATTAGTGTATAAT**A**TAACTTT**T**ACTTCATTAGTGTTACTTTTCCTCGATACTT**AA**TGGCTCTGAATAATATTATCTCTTAGAAGATCTCCGAAGTTGT**T**GTATAAAAATTCATT

Ts-1 (466) TTTTCCATTAGTGTATAAT**G**TAACTTT**T**ACTTCATTAGTGTTACTTTTCCTCGATACTT**GG**TGGCTCTGAATAATATTATCTCTTAGAAGATCTCCGAAGTTGT**C**GTATAAAAATTCATT

Tsu-1 (510) TTTTCCATTAGTGTATAAT**G**TAACTTT**-**ACTTCATTAGTGTTACTTTTCCTCGATACTT**GG**TGGCTCTGAATAATATTATCTCTTAGAAGATCTCCGAAGTTGT**C**GTATAAAAATTCATT

1321 1440

Col-0 (1311) TACAAAC**T**TAGGTGGAGATAACATTTTAAAAGAATGGATTCTTTAGTGCTAAACGCATTTAAGAAAGATGAACATATTTTGTTCGTCCTCTATTGGCAACATCTTTATCAAGACTCGAAT

Ts-1 (586) TACAAAC**C**TAGGTGGAGATAACATTTTAAAAGAATGGATTCTTTAGTGCTAAACGCATTTAAGAAAGATGAACATATTTTGTTCGTCCTCTATTGGCAACATCTTTATCAAGACTCGAAT

Tsu-1 (629) --CAAAC**C**TAGGTGGAGATAACATTTTAAAAGAATGGATTCTTTAGTGCTAAACGCATTTAAGAAAGATGAACATATTTTGTTCGTCCTCTATTGGCAACATCTTTATCAAGACTCGAAT

1441 1560

Col-0 (1431) TTAATTCTCTTTAAA**A**AGAGATTTAAATATGTTAATGATTTAAAAGTGGCCA**T**CTAGCAAGTGATTGATACATCACGATTTAAATATTATTATAATATCACTTCCTAGATTGTGTCCCTT

Ts-1 (706) TTAATTCTCTTTAAA**T**AGAGATTTAAATATGTTAATGATTTAAAAGTGGCCA**C**CTAGCAAGTGATTGATACATCACGATTTAAATATTATTATAATATCACTTCCTAGATTGTGTCCCTT

Tsu-1 (747) TTAATTCTCTTTAAA**T**AGAGATTTAAATATGTTAATGATTTAAAAGTGGCCA**C**CTAGCAAGTGATTGATACATCACGATTTAAATATTATTATAATATCACTTCCTAGATTGTGTCCCTT

1561 1680

Col-0 (1551) TCCTAGTCCCTATCATACAATAGTTA**T**CCTCGTGCACATAACACTCTTAAAAATACACACCATCTTGTAATTCAAATTTGATGTGTTCGTACATATTTTCAACCATTTGTTTCTATTTCA

Ts-1 (826) TCCTAGTCCCTATCATACAATAGTTA**C**CCTCGTGCACATAACACTCTTAAAAATACACACCATCTTGTAATTCAAATTTGATGTGTTCGTACATATTTTCAACCATTTGTTTCTATTTCA

Tsu-1 (867) TCCTAGTCCCTATCATACAATAGTTA**C**CCTCGTGCACATAACACTCTTAAAAATACACACCATCTTGTAATTCAAATTTGATGTGTTCGTACATATTTTCAACCATTTGTTTCTATTTCA

1681 1800

Col-0 (1671) AATTCTTCTCGTAAAAATATGTCCATTTAACCAGAAGTGGATAGCTCGACCGGAAACATACTAATTTTTTTTT-AAATATCACATCGAGTGACTGCGGGTATAAGTAAAAATATTAAAGA

Ts-1 (946) AATTCTTCTCGTAAAAATATGTCCATTTAACCAGAAGTGGATAGCTCGACCGGAAACATACTATTTTTTTTTTTAAATATCACATCGAGTGACTGCGGGTATAAGTAAAAATATTAAAGA

Tsu-1 (987) AATTCTTCTCGTAAAAATATGTCCATTTAACCAGAAGTGGATAGCTCGACCGGAAACATACTATTTTTTTTTTTAAATATCACATCGAGTGACTGCGGGTATAAGTAAAAATATTAAAGA

1801 1920

Col-0 (1790) CTAATCCGAACATAAAAAATTATTAGAGCATCCGCATTGCACATTTAGTTTAAATGTATTTCCACATAAATTTAATTCATAAAATAAGAAAATGGTCTTTAAATGAAAGATATCCTTCCA

Ts-1 (1066) CTAATCCGAACATAAAAAATTATTAGAGCATCAGCATTGCACATTTAGTTTAAATGTATTTCCACATAAATTTAATTCATGAAATAAGAAAATGGTCTTTAAATGAAAGATATCCTTCCA

Tsu-1 (1107) CTAATCCGAACATAAAAAATTATTAGAGCATCAGCATTGCACATTTAGTTTAAATGTATTTCCACATAAATTTAATTCATAAAATAAGAAAATGGTCTTTAAATGAAAGATATCCTTCCA

1921 2040

Col-0 (1910) AAAATGTGTCAAAGAAGACATTTTGAAACACATTGAAAAATGGGTCTTCCATTTAAAAAGACTATTCATACTTTATTAATAATATTTATATGAGAATACACACAAAAAATATATGCGATG

Ts-1 (1186) AAAATGTGTCAAAGAAGACATTTTGAAACACATTGAAAAATGGGTCTTCCATTTAAAGAGACTATTCATACTTTATTGATAATATTTATATGAGAATACACACAAAATATATATGCAATG

Tsu-1 (1227) AAAATGTGTCAAAGAAGACATTTTGAAACACATTGAAAAATGGGTCTTCCATTTAAAAAGACTATTCATACTTTATTGATAATATTTATATGAGAATACACACAAAATATATATGCAATG

2041 2160

Col-0 (2030) TGGGTGGTCTTATGGGCTTTTGCCCGAAATCTAAGTATGGTAACTAAAAATAAGGGCATAAAAACATCCACATTGGTGTACACTCTTAAAAA**A**GTAGTTAGTATAATTTATTATAAAAGC

Ts-1 (1306) TGGGTGGTCTTATGGGCTTTTGCCCGAAATCTAAGTATGGTAACTAAAAATAAGGGCATAAAAACATCCACATTGGTGTACACTCTTAAAAA**T**GTAGTTAGTATAATTTATTATAAAAGC

Tsu-1 (1347) TGGGTGGTCTTATGGGCTTTTGCCCGAAATCTAAGTATGGTAACTAAAAATAAGGGCATAAAAACATCCACATTGGTGTACACTCTTAAAAA**T**GTAGTTAGTATAATTTATTATAAAAGC

2161 2280

Col-0 (2150) TAATATTATTGGGTAATATTAGAAAATAA**T**CATAGAATTGAAAAGAATGAAGTAAGTAA**T**CATTGTCAGTTTGTATGTGAGTAAATAACCTTATGACGACATAAGAAAATACAAAAATGT

Ts-1 (1426) TAATATTATTGGGTAATATTAGAAAATAA**C**CATAGAATTGAAAAGAATGAAGTAAGTAA**C**CATTGTCAGTTTGTATGTGAGTAAATAACCTTATGACGACATAAAAAAATACAAAAATGT

Tsu-1 (1467) TAATATTATTGGGTAATATTAGAAAATAA**C**CATAGAATTGAAAAGAATGAAGTAAGTAA**C**CATTGTCAGTTTGTATGTGAGTAAATAACCTTATGACGACATAAAAAAATACAAAAATGT

2281 2400

Col-0 (2270) TCTCGCAAGTTGAACCAAAAGCAAGAGTATGAGAATAGCATGATATTTAAAAAAAAAGTGACATTTT-------------ATAATGTGTTATGAGAAAAAATAGCATGTTGACAGAGAAA

Ts-1 (1546) TCTCGCAAGTTGAACCAAAAGCAAGAGTATGAGAATAGCATGATATTTAAAAAAAAAGTGAC**AATGTGTTAT**GAGAATAAAT**AATGTGTTAT**ATGAAAAAATAGCATGTTGACAGAGAAA

Tsu-1 (1587) TCTCGCAAGTTGAACCAAAAGCAAGAGTATGAGAATAGCATGATATTTTAAAAAAAAGTGAC**AATGTGTTAT**GAGAATAAAT**AATGTGTTAT**ATGAAAAAATAGCATGTTGACAGAGAAA

2401 2520

Col-0 (2377) GATTTCCACTTATCACGTGTAATTCAAAAAAGTAGCATGGTACAAAAGAAAATAACATACAATTTAAAATGAAAATATAACGACAAAAATTCCAATAAAAAATCAAAGTCGAACAAAATA

Ts-1 (1666) GATTTCCACTTGTCACGTGTAATTCAAAAAAGTAGCATGGTACAAAAGAAAATAACATACAATTTAAAATGAAAATATAACGACGAAAATTCCAATAAAAAATCAAAATCGAACAAAATA

Tsu-1 (1707) GATTTCCACTTGTCACGTGTAATTCAAAAAAGTAGCATGGTACAAAAGAAAATAACATACAATTTAAAATGAAAATATAACGACGAAAATTCCAATAAAAAATCAAAATCGAACAAAATA

2521 2640

Col-0 (2497) AATAGCACGATATTTATCAAAAAGTGACATTTTATAATGTGCTATGAGAACTAATAATTTGTTATATGAAAAAATAGCATGTTGTTTGAAAGAGATTTTTAATTATAACGTGTAATTCAC

Ts-1 (1786) AATAGCACGATATTTATCAAAAAGTGACATTTTATAATGTGCTATGAGAACTAATAATTTGTTATATGAAAAAATAGCATGTTGTTTGAGAGAGATTTTTAATTATAACGTGTAATTCAC

Tsu-1 (1827) AATAACATGACATTTATCAAAAAGTGACATTTTATAATGTGCTATGAGAACTAATAATTTGTTATATGAAAAAATAGCATGTTGTTTGAGAGAGATTTTTAATTATAACGTGTAATTCAC

2641 2760

Col-0 (2617) AAAAGTAGCATGGTAAAAAAGAAAATAACATACAATTTAAAAAGAAAA**T**ATAACGACGGAGATTCCAAGAAAGAATCAAAATCAAACAAAATAAAATGAGAAATCTTCTGCAAATTGAGG

Ts-1 (1906) AAAAGTAGCATGGTAAAAAAGAAAATAACATACAATTTAAAAAGAAAA**C**ATAACGACGGAGATTCCAAGAAAGAATCAAAATCAAACAAAATAAAATGAGAAATCTTCTGCAAATTGAGG

Tsu-1 (1947) AAAAGTAGCATGGTAAAAAAGAAAATAACATACAATTTAAAAAGAAAA**C**ATAACGACGGAGATTCCAAGAAAGAATCAAAATCAAACAAAATAAAATGAGAAATCTTCTGCAAATTGAGG

2761 2880

Col-0 (2737) GAGAGATGATCCGTCAATATAAATAACGTTTAGCAGCCTAGATTTATCGAAAAAGAGATCTGGTGGTTGTGATGGTGGAAGATGTGGTGGTTGTGGTGGTGGAAGAAAGAGAGATGAGTG

Ts-1 (2026) GAGAGATGATCCGTCAATATAAATAACGTTTAGCAGCCTAGATTTATCGAAAAGGAGATCTGGTGGTTGTGATGGTGGAAGATGTGGTGGTTGTGGTGGTGGAAGAAAGAGAGATGAGTG

Tsu-1 (2067) GAGAGATGATCCGTCAATATAAATAACGTTTAGCAGCCTAGATTTATCGAAAAAGAGATCTGGTGGTTGTGATGGTGGAAGATGTGGTGGTTGTGGTGGTGGATGAAAGAGAGATGAGTG

2881 3000

Col-0 (2857) GTGGTTTGTTCGGGTTCATCAAAAGTTTTTCGCCATGAAATCATCTAAGTGTTCTATGTGATTTTGGAAAATAGCGTGTAATACATATAAAATTCGACAATGGGTAAAAAGGTAATTGCA

Ts-1 (2146) GTGGTTTGTTCGGGTTCATCAAAAGTTTTTCGCCATGAAATCATCTAAGTGTTCTATGTGATTTTGGAAAATAGCGTGTAATACATATAAAATTCGATAATGGGTAAAAAGGTAATTGCA

Tsu-1 (2187) GTGGTTTGTTCGGGTTCATCAAAAGTTTTTCGCCATGAAATCATCTAAGTGTTCTATGTGATTTTGGAAAATAGCGTGTAATACATATAAAATTCGATAATGTGTAAAAAGATAATTGCA

3001 3120

Col-0 (2977) AGTGAAAAAAAAGAGTGTACTCTGACACCATAGCT**A**CTTTGTTAATTCTTTTAAGATTCATAGTTATTTTGTGCATATTCTCAATATTATTTTAATTTTGAGGTATTCATTAACCATGTA

Ts-1 (2266) AGTAAAAAAAAAGAGTGTACTCTGACACCATAGCT**G**CTTTGTTAATTCTTTTAAGATTCATAGTTATTTTGTGCATATTCTCAATATTATTTTAATTTTGAGGTATTCATTAACCATGTA

Tsu-1 (2307) AGTAAAAAAAAAGAGTGTACTCTGACACCATAGCT**G**CTTTGTTAATTCTTTTAAGATTCATAGTTATTTTGTGCATATTCTCAATATTATTTTAATTTTGAGGTATTCATTAACCATGTA

3121 3240

Col-0 (3097) AAATGTCTTTAAAGATATAAAAATGTCTTTGCGAAAACAGCGAAGACACGTGTCTTTCCCGTTGAATGCACTAAATAACTTGTTTT-TTTTTTTTAATGTTTTTTAAAAACAAATTTGAA

Ts-1 (2386) AAATGTCTTTAAAGATACAAAAATGTCTTTGCGAAAACAGCGAAGACACGTGTCTTTCCCGTTGAATGCACTAAATAACTTGTTTTCTTTTTTTTAATGTTTTTTAAAAACAAATTTGAA

Tsu-1 (2427) AAATGTCTTTAAAGATACAAAAATGTCTTTGCGAAAACAGCGAAGACACGTGTCTTTCCTGTTGAATGCACTAAATAACTTGTTTTCTTTTTTTTAATGTTTTTTAAAAACAAATTTGAA

3241 3360

Col-0 (3216) AACACTAACTTTTTTGTGTGATGAAAATGGTCTAAAGAACATCCTCATTAAACAACTTTTAAAAGATGTCTTTAGTATTAATTAGTAATAAAATTTAAAACACTCCTTCTTTTTTGTGTC

Ts-1 (2506) AACACTAACTTTTTTGTGTGATGAAAATGGTCTAAAGAACATCCTCATTAAACAACTTTTAAAAGATGTCTTTACTATTAATTAGTAATAAAATTTAAAACACTCCTTCTTTTTTGTGTC

Tsu-1 (2547) AACACTAACTTTTTTGTGTGATGAAAATGGTCTAAAGAACATCCTCATTAAACAACTTTTAAAAGATGTCTTTAGTATTAATTAGTAATAAAATTTAAAACACTCCTTCTTTTGTGTGTC

3361 3480

Col-0 (3336) TAAAATGTCTTTTTAAAGACAAAAACTAAAACTAAAAAACACTCACCATTTTTTATTGATTATTTTTATTAGTTTTATATTTAAAAACACTAATATGGATGTTCTTAGAATATGGTCATC

Ts-1 (2626) TAAAATGTCTTTTTTAAGACAAAATCTAAAACTAAAAAACACCCACCATTTTTTATTGATTATTTTTATTATTTTTATATTTAAAAACACCAATATGGATGTTCTTAGAGTATGGTCATC

Tsu-1 (2667) TAAAATGTCTTTTTAAAGACAAAATCTAAAACTAAAAAACACTCACCATTTTTTATTGATTATTTTTATTAGTTTTATATTTAAAAACACCAATATGGATGTTCTTAGAATATGGTCATC

3481 3600

Col-0 (3456) TATATTTCTCAAATAGTTTAATGTGGGTGCTCTTAGAGTATGGTCATTTATATTTTCTCAAATAGTTTTATTTTGTCAACGTTTGGTGTATCAACTATTTTGCAAATAGCAGATACTTTC

Ts-1 (2746) TATATTTCTCAAATAGTTTAATGTGGGTGCTCTTAGAGTATGGTCATTTATATTTTCTCAAATATTTTTGTTTTGTCAACGTTTGGTGTATCAACTATTTTGCAAATAGCAGATACTTTC

Tsu-1 (2787) TATATTTCTCAAATAGTTTAATGTGGGTGCTCTTAGACTATGGTCATTTATATTTTCTCAAATAGTTTTATTTTGTCAACGTTTGGTGTATCAACTATTTTGCAAATAGCAGATACTTTC

3601 3720

Col-0 (3576) AGTGAAATTCCTTATCATCGAGGTCATACCTCCTTTGGCATACATTGTAAAGTCTCTAACATAAGCCAACAACTTGCAAGCTCTAATGATTCACAAGTTGATAACACCATTTTGCAAGCT

Ts-1 (2866) AGTGAAATTCCTTATCATCGAGGTCATACCTCCTTTGGCATACATAGTAAAGTCTCTAACATAAGCCAACAACTTGCAAGCTCTAATGATTCACAAGTTGATAACACCATTTTGCAAGCT

Tsu-1 (2907) AGTGAAATTCCTTATCATCGAGGTCATACCTCCTTTGGCATACATTGTAAAGTCTCTAACATAAGCCAACAACTTGCAAGCTCTAATGATTCACAAGTTGATAACACCATTTTGCAAGCT

3721 3840

Col-0 (3696) CTAATAATGATTCATTAAACAAATTGGCAATTTTCAAATACCAACACCACCCTTTTTCTTGTTAAAATTACTATTGTTTATTTTATTTTATTTAATGTTAAATTATATTTAAAAGAAAAA

Ts-1 (2986) CTAATAATGATTCATTAAACAAATTGGCAATTTTCAAATACCAACACCACCCTTTTTCTTGTTAAAATTACTATTGTTTATTTTATTTTATTTAATGTTAAATTATATTTAAAAGAAAAA

Tsu-1 (3027) CTAATAATGATTCATTAAACAAATTGGCAATTTTCAAATACCAACACCACCCTTTTTCTTGTTAAAATTACTATTGTTTATTTTATTTTATTTAATGTTAAATTATATTTAAAAGAAAAA

3841 3960

Col-0 (3816) TAACCTTGGTACATATGAAATGCTAACTTTTTCAAGAGTTATTTTAAAAAAACAGAATTTCTAATATATCTATTGTCTTGATTCAAACCAAATTTGGATGCCATTTTTGAACTTCAATCC

Ts-1 (3106) TAACCTTGGTACATATGAAATGCTAACTTTTTCAAGAATTATTTTAAAAAAACAGAATTTCTAATATATCTATTGTCTTGATTCAAACCAAATTTGGATGCCATTTTTGAACTTCAATCC

Tsu-1 (3147) TAACCTTGGTACATATGAAATGCTAACTTTTTCAAGAATTATTTTAAAAAAACAGAATTTCTAATATATCTATTGTCTTGATTCAAACCAAATTTGGATGCCATTTTTGAACTTCAATCC

3961 4080

Col-0 (3936) TCCACCACCTTGAATTGTGCTCAAACGGTTTCTAATATTCTTGTCTATGATCATCACAAGTATTTCCGTTGGTGATGATTGCTCCCCATGCCTCCTCCTATTCTGTTCATTCCATATTGA

Ts-1 (3226) TCCACCACCTTGAATTGTGCTCAAACGGTTTCTAATATTCTTGTCTATGATCATCACAAGTATTTCCGTTGGTGATGATTGCTCCC-ATGCCTCCTCCTATTCTGTTCATTCCATATTGA

Tsu-1 (3267) TCCACCACCTTGAATTGTGCTCAAACGGTTTCTAATATTCTTGTCTATGATCATCACAAGTATTTCCGTTGGTGATGATTGCTCCCCATGCCTCCTCCTATTCTGTTCATTCCATATTGA

4081 4200

Col-0 (4056) GTGTATAGAGTTCTGTAGTGCATACCGAAGTATGTAGCTCTTCGTTTTGTCCACAAGGTTTTCAGATAAAATCTTCATAACCTCT**G**TCCAACTCACCGAGAATCTGTCCGAGAAAATTCC

Ts-1 (3345) GTGTATAGAGTTCTGTAGTGCATACCGAAGTATGTAGCTCTTCGTTTTGTCCACAAGGTTTTCAGATAAAATCTTCATAACCTCT**A**TCCAACTCACCGAGAATCTGTCCGAGAAAATTCC

Tsu-1 (3387) GTGTATAGAGTTCTGTAGTGCATACCGAAGTATGTAGCTCTTCGTTTTGTCCACAAGGTTTTCAGATAAAATCTTCATAACCTCT**G**TCCAACTCACCGAGAATCTGTCCGAGAAAATTCC

4201 4320

Col-0 (4176) CCTTGTTAGGTCTTCCCATATCTTTTTGAGTATAGGCAGTGGAAAAATAAGTGTTCCCTCGTCTCTACTCG--------------TTCATTGCAAAAAATGCAGCTCGAATCTACATTAC

Ts-1 (3465) CCTTGTTAGGTCTTCCCATATCTTTTTGAGTAGAGGCAGTGGAAAAATAAGTGTTCCCTCGTCTCTACTTGT**TCATTGCAAA**TTGT**TCATTGCAAA**AAATGCAGCTCGAATCTACATTAC

Tsu-1 (3507) CCTTGTTAGGTCTTCCCATATCTTTTTGAGTAGAGGCAGTGGAAAAATAAGTGTTCCCTCGTCTCTACTTGC**TCATTGCAAA**TTGT**TCATTGCAAA**AATTGCAGCTCGAATCTACATTAC

4321 4440

Col-0 (4282) AATTCCACTTCCTCATTCTCTCCCCTGTTGCGACTCTGTTTTTTACAACCGTATTGTTATACTTTGGAGTAGCGTATGGGAACCATATCTCATTTTGTCCCTCCATCGGCGGCTTTGCTA

Ts-1 (3585) AATTCCACTTCCTCATTCTCTCCCCTGTTGCGACTCTGTTTTTTACAACCGTATTGTTATACTTTGGAGTAGCGTATGGGAACCATATCTCATTTTGTCCCTCCATCGGCGGCTTTGCTA

Tsu-1 (3627) AACTCCACTTCCTCATTCTCTCCCCTGTTGCGACTCTGTTTTTTACAACCGTATTGTTATACTTTGGAGTAGCGTATGGGAACCATATCTCATTTTGTCCCTCCATCGGCGGCTTTGCTA

4441 4560

Col-0 (4402) ACCGCAGCTGTGACCAAGAACATTTATTTTTCCCTTTTAACAGAACTATATCGTGATCGTTCAGTTCTCCATTCAGCTTCTGTTTTCTTATTTCTTCTTCAACACGGTTTAAGATACCCT

Ts-1 (3705) ACCGCAGCTGTGACCAAGAACATTTATTTTTCCCTTTTAACAGAACTATATCGTGATCGTTCAGTTCTCCATTCAGCTTCTGTTTTCTTATTTCTTCTTCAACACGGTTTAAGATACCCT

Tsu-1 (3747) ACCGCAGCTGTGACCAAGAACATTTATTTTTCCCTTTTAACAGAACTATATCGTGATCGTTCAGTTCTCCATTCAGCTTCTGTTTTCTTATTTCTTCTTCAACACGGTTTAAGATACCCT

4561 4680

Col-0 (4522) TTCGATGGTTTCTCCTTCGTGTCATGGACATCACCTCTTTCATTGTGCTTGAACTAGGAATCCCTAGATCAATGCATCCTCTCTAAGACATCCCATGTTACTCCATGTGTCAATACCAAA

Ts-1 (3825) TTCGATGGTTTCTCCTTCGTGTCAGGGACATCACCTCTTTCATTGTGCTTGAACTAGGAATCCCTAGATCAATGCATCCTCTCTAAGACATCCCATGTTACTCCATGTGTCAATACCAAA

Tsu-1 (3867) TTCGATGGTTTCTCCTTCGTGTCATGGACATCACCTCTTTCATTGTGCTTGAACTAGGAATCCCTAGATCAATGCATCCTCTCTAAGACATCCCATGTTACTCCATGTGTCAATACCAAA

4681 4800

Col-0 (4642) AAGACGTAGTTTCGCCGCTTTTAACCACTACCATGACTGTTGATCTCTTTAAATAATTAAAAAGTGGTGTTCCCCATGA**A**GACCGTTCACTTCCATCAATTTATGGTCTTCTT-GGACCA

Ts-1 (3945) AAGACGTAGTTTCGCCGCTTTTAACCACTACCATGACTGTTGATCTCTTTAAATAATTAAAAAGTGGTGTTCCCCATGA**G**GACCGTTCACTTCCATCAATTTATGGTCTTCTT-GGACCA

Tsu-1 (3987) AAGACGTAGTTTCGCCGCTTTTAACCACTACCATGACTGTTGATCTCTTTAAATAATTAAAAAGTGGTGTTCCCCATGA**G**GACCGTTCACTTCCATCAATTTATGGTCTTCTTTGGACCA

4801 4920

Col-0 (4761) ATTTCGTTTATCCAAACTATTACCCCTACAACATCGTTTATAAATTGTCTTT-ACATTTTGATCTAGAATTTGATCTATTTTGCACGAATCCTCTTCCACCTTTTCAGGCATGTACGAGC

Ts-1 (4064) ATTTCGTTTATCCAAACTATTACCCCTACAACATCGTTTATAAATTGTCTTT-ACATTTTGATCTAGAATTTGATCTATTTTGCACGAATCCTCTTCCACCTTTTCAGGCATGTACGAGC

Tsu-1 (4107) ATTTCGTTTATCCAAACTATTACCCCTACAACATCGTTTATAAATTGTCTTTTACATTTTGATCTAGAATTTGATCTATTTTGCACGAATCCTCTTCCACCTTTTCAGGCATGTACGAGC

4921 5040

Col-0 (4880) AATATAACATGAGTTTGATCAAATTTTGCATGGTCTCTACGAAGTTGAGTCATGCAATTTTTACCTATAATTTTTGTTCTCGGCATTTTTATAGCTCTCTACTTAGGATATAAGTAACAT

Ts-1 (4183) AATATAACATGAGTTTGATCAAATTTTGCATGGTCTCTACGAAGTTGAGTCATGCAATTTTTACCTATAATTTTTGTTCTCGGCATTTTTATAGCTCTCTACTTAGGATATAAGTAACAT

Tsu-1 (4227) AATATAACATGAGTTTGATCAAATTTTGCATGGTCTCTACGAAGTTGAGTCATGCAATTTTTACCTATAATTTTTGTTCTCGGCATTTTTATAGCTCTCTACTTAGGATATAAGTAACAT

5041 5160

Col-0 (5000) GGAGTTGGATGAATCCTTTTCTTTATATTGAAATCGAATCTTCAATGCTAAAAATAAAATCCACTCAATCAGTGAGAGAATTATTATGGAACAAGCTATA----AAGACGAAAGAATCAC

Ts-1 (4303) GGAGTTGGATGAATCCTTTTCTTTATATTGAAATCGAATCTTCAATGCTAAAAATAAAATCCACTCAATCAGTGAGAGAATTATTATGGAACAAACTATATATAAAGACGAAAGAATCAC

Tsu-1 (4347) GGAGTTGGATGAATCCTTTTCTTTATATTGAAATCGAATCTTCAATGCTAAAAATAAAATCCACTCAATCAGTGAGAGAATTATTATGGAACAAACTATATATAAAGACGAAAGAATCAC

5161 5280

Col-0 (5116) TCAATCATACAATAAAGAAGGATGTTTTTTTCATTTAAACTAAGAAAGAGAACTTTTCCACGTGAATTAAAATAGACATCTCAATAATAAAGACGATTTTTTTTCTTCTCTTTTTCCTCT

Ts-1 (4423) TCAATCATACAATAAAGAAGGATGTTTTTTTCATTTAAATTAAGAAAGAGAACTTTTCCACGTGAATTAAAATAGACATCTCAATAATAAAGACGATTTTTTTT-CTCTCTTTTTCCTCT

Tsu-1 (4467) TCAATCATACAATAAAGAAGGATGTTTTTTTCATTTAAATTAAGAAAGAGAACTTTTCCACGTGAATTAAAATAGACATCTCAATAATAAAGACGATTTTTTTTTCTCTCTTTTTCCTCT

5281 5400

Col-0 (5236) CACTTTGTATTGTATTGTATTTCTATATATTTCTTCCTCTTACAAATACCCTTTTAAATTGGAAAGAAAAAA**---CAGGAAT-CGCTATCATCAGTAATAGTC-ATCATTAATCA-ATTT**

Ts-1 (4542) CACTTTGTATTGTA-----TTTCTATATCTTTCTTCCTCTTACAAATACCCTTTTAAATTGGAAAGAAAAAA**TCTCTGAAAAACGATATAAACTGGACAACGCTATCATTAGTAATAGTA**

Tsu-1 (4587) CACTTTGTATTGTA-----TTTCTATATCTTTCTTCCTCTTACAAATACCCTTTTAAATTGGAAAGAAAAAA**TCTCTGAAAAACGATATAAACTGGACAACGCTATCATTAGTAATAGTA**

5401 5510

Col-0 (5350) **AT-ATGTAA**TATGTGGCTGACAATTTCCATGTACGTGTAATATGTAATATATAAACACAA**CTT**ATGGCCAGTATAATATTAATGCTTAAACCGACTCGAGAACTAAAATG

Ts-1 (4657) **ATCATCTTT**TATGTGGCTGACAATTTCCATGTACGTGTAATATGTAATATATAAACACAA**-TC**ATGGCCAGTATAATATTAATGCTTAGACCGACTCGAGAACTAAAATG

Tsu-1 (4702) **ATCATTTTT**TATGTGGCTGACAATTTCCATGTACGTGTAATATGTAATATATAAACACAA**-TC**ATGGCCAGTATAATATTAATGCTTAGACCGACTCGAGAACTAAAATG

(*) Major polymorphisms between Col-0 and Ts-1 and Tsu-1 sequences have been highlighted.

1. The first major polymorphism affects two repeated units that are present in Col-0 (Letters in blue).

2. In red are represented in Ts-1 and Tsu-1 duplicated sequences that are only present once in Col-0.

3. The putative CAAT and TATA boxes predicted by Uozumi *et al.* (2000) as well as the ATG translational start codon have been underlined. The first CAAT box is not present in the Ts-1 and Tsu-1 promoter sequences as a consequence of the polymorphism.

4. Confirmed SNPs as well as small Indels between Col-0, Ts-1 and Tsu-1 sequences appear in bold letters.
